1 **Fast and easy disinfection of coronavirus-contaminated face masks using ozone**  
2 **gas produced by a dielectric barrier discharge plasma generator**

3  
4 Jinyeop Lee<sup>1+</sup>, Cheolwoo Bong<sup>1+</sup>, Pan K. Bae<sup>2</sup>, Abdurhaman T. Abafogi<sup>1</sup>, Seung H. Baek<sup>1</sup>, Yong-Beom  
5 Shin<sup>2,3,4</sup>, Moon S. Bak<sup>1,5,\*</sup>, and Sungsu Park<sup>1,5,6,\*</sup>

6  
7 <sup>1</sup>School of Mechanical Engineering, Sungkyunkwan University, Suwon 16419, Korea

8 <sup>2</sup>BioNano Health Guard Research Center (H-GUARD), Daejeon 34141, Korea

9 <sup>3</sup>Bionanotechnology Research Center, Korea Research Institute of Bioscience and Biotechnology  
10 (KRIBB),

11 Daejeon 34141, Korea

12 <sup>4</sup>Department of bioengineering, KRIBB School, University of science and Technology (UST), Daejeon  
13 34141,

14 Korea

15 <sup>5</sup>Biomedical Institute for Convergence at SKKU (BICS), Sungkyunkwan University, Suwon 16419, Korea

16 <sup>6</sup>Institute of Quantum Biophysics (iQB), Sungkyunkwan University, Suwon 16419, Korea

17  
18  
19 <sup>+</sup> Each contributed equally to the work.

20 <sup>\*</sup>Correspondence and requests for materials should be addressed to M. S. Bak  
21 (moonsoo@skku.edu)/S. Park (nanopark@skku.edu).

22  
23  
24  
25  
26  
27  
28  
29  
30  
31  
32  
33  
34  
35  
36  
37 **NOTE: This preprint reports new research that has not been certified by peer review and should not be used to guide clinical practice.**

38 **Abstract**

39 Face masks are one of the currently available options for preventing the transmission of the  
40 severe acute respiratory syndrome coronavirus 2 (SARS-CoV-2), which has caused the 2019  
41 pandemic. However, with the increasing demand for protection, face masks are becoming  
42 limited in stock, and the concerned individuals and healthcare workers from many countries  
43 are now facing the issue of the reuse of potentially contaminated masks. Although various  
44 technologies already exist for the sterilization of medical equipment, most of them are not  
45 applicable for eliminating virus from face masks. Thus, there is an urgent need to develop a  
46 fast and easy method of disinfecting contaminated face masks. In this study, using a human  
47 coronavirus (HCoV-229E) as a surrogate for SARS-CoV-2 contamination on face masks, we  
48 show that the virus loses its infectivity to a human cell line (MRC-5) when exposed for a short  
49 period of time (1 min) to ozone gas produced by a dielectric barrier discharge plasma  
50 generator. Scanning electron microscopy and particulate filtration efficiency (PFE) tests  
51 revealed that there was no structural or functional deterioration observed in the face masks  
52 even after they underwent excessive exposure to ozone (five 1-minute exposures).  
53 Interestingly, for face masks exposed to ozone gas for 5 min, the amplification of HCoV-229E  
54 RNA by reverse transcription polymerase chain reaction suggested a loss of infectivity under  
55 the effect of ozone, primarily owing to the damage caused to viral envelopes or envelope  
56 proteins. Ozone gas is a strong oxidizing agent with the ability to kill viruses on hard-to-reach  
57 surfaces, including the fabric structure of face masks. These results suggest that it may be  
58 possible to rapidly disinfect contaminated face masks using a plasma generator in a well-  
59 ventilated place.

60 Keyword: face mask, coronavirus, ozone gas, disinfection.

61  
62  
63  
64  
65  
66  
67  
68  
69

70 **Introduction**

71 Face masks are serving as one of the options for preventing severe acute respiratory syndrome  
72 coronavirus 2 (SARS-CoV-2), which has caused the 2019 international pandemic of the  
73 coronavirus disease.<sup>1</sup> However, with increasing demands for protection, face masks are  
74 becoming limited in stock; concerned individuals and healthcare workers from many countries  
75 are now facing the issue of the reuse of potentially contaminated masks in many countries.  
76 Thus, there is an urgent need to develop a fast and easy method of disinfecting contaminated  
77 face masks. There already exist technologies for the sterilization of medical equipment,  
78 including personal protective equipment (PPE); these technologies include autoclave  
79 treatment, ethylene oxide gassing, ionized hydrogen peroxide fogging and hydrogen peroxide  
80 vaporization.<sup>2</sup> However, most of them are not practical for disinfecting face masks with SARS-  
81 CoV-2.<sup>2</sup> It was reported that ozone gas produced by plasma generators can inactivate various  
82 types of viruses on different surfaces, including porous ones.<sup>3-6</sup> Ozone is a powerful oxidizing  
83 agent, but it does not linger. Its production, involving the use of electricity and a normal  
84 atmosphere, is easy and inexpensive. However, it has not been determined whether ozone  
85 gas can disinfect face masks contaminated with SARS-CoV-2 without compromising the  
86 filtration efficiency of the masks.

87 Here we show that a human coronavirus (HCoV-229E)<sup>7,8</sup> as a surrogate for SARS-CoV-2 on  
88 face masks lost its infectivity to a human cell line (MRC-5) when exposed to gaseous ozone  
89 produced by a dielectric barrier discharge (DBD) plasma generator<sup>9</sup> for a short time (1 min)  
90 (Figure 1). Neither structural nor functional deterioration of the face masks even with  
91 excessive exposures (5 times, 5 min per each time) to the ozone were observed by scanning  
92 electron microscopy (SEM) and a particulate filtration efficiency (PFE) test. Interestingly, RNA  
93 of HCoV-229E on the face masks by the ozone for 5 min was amplified by reverse transcription  
94 polymerase chain reaction (RT-PCR). This is the first demonstration of the potential of using  
95 ozone gas for disinfecting face masks contaminated with a coronavirus.

96

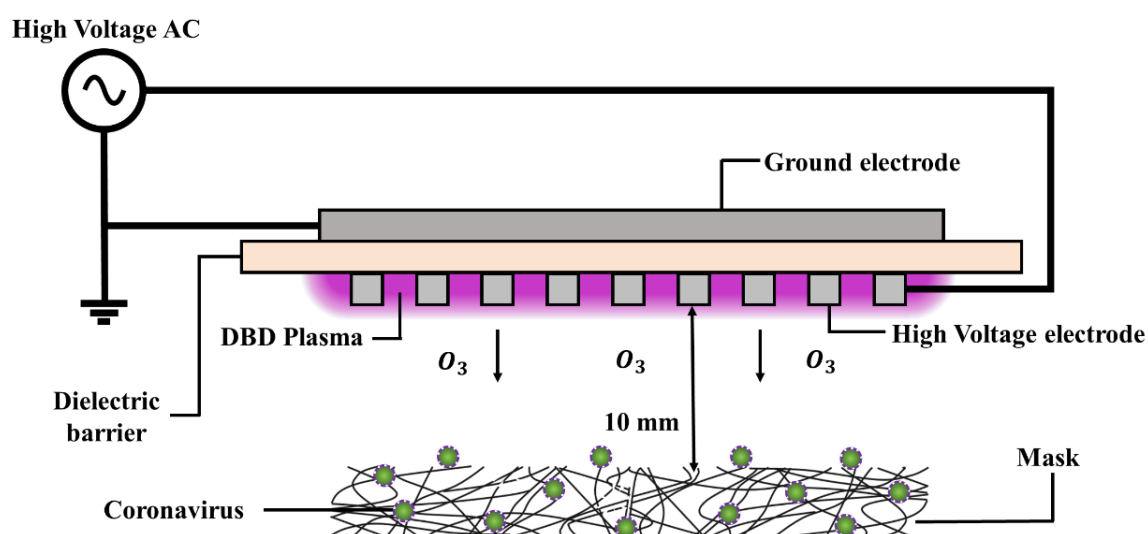

97

98 Figure 1. A schematic diagram describing the disinfection of a face mask contaminated by a  
99 coronavirus using ozone produced by a DBD plasma generator. It consists of a high-voltage,  
100 high-frequency power supply and two electrodes separated by a 1 mm-thick alumina  
101 dielectric barrier. Plasma was produced on the face of the device with the perforated  
102 electrode, along the rims of the holes.

103

## 104 ■ RESULTS AND DISCUSSION

105 **Inhibitory effect of ozone gas on virus and bacteria on face masks.** Among the numerous  
106 types of plasma generators, the dielectric barrier discharge (DBD) plasma generator is  
107 considered the most energy-efficient and cost-effective plasma generator for ozone  
108 production; it forms ozone through the dissociation of molecular oxygen (O<sub>2</sub>) by collisions with  
109 excited electronic nitrogen populated by electron impacts and the ensuing combination  
110 between the atomic oxygen and O<sub>2</sub>.<sup>9</sup>

111 When face masks, experimentally contaminated with a human coronavirus (HCoV-229E)<sup>7,8</sup>  
112 as a surrogate, were exposed to ozone gas (about 120 ppm) produced by the plasma  
113 generator for either 1 or 5 min, no viable HCoV-22E was recovered from the face masks (Table  
114 1). Corresponding untreated face masks showed the recovery of about 3 log units of tissue  
115 culture infective dose 50% (log TCID<sub>50</sub>) per mL following 15 min of air drying. To the best of  
116 our knowledge, this is the first demonstration of the potential of using ozone gas for

117 disinfecting face masks contaminated with a coronavirus. Similar results were obtained for  
118 face masks experimentally contaminated with either influenza A virus (H1N1)<sup>10</sup> (Table S1) or  
119 Gram-positive bacteria *Staphylococcus aureus* (Table S2 and Figure S1) when exposed to  
120 ozone gas. These results suggest that virus and bacteria on face masks can be inactivated by  
121 ozone gas at a concentration of about 120 ppm within a short time (1-5 min).

122

123 Table 1. HCoV-229E titer recovered from contaminated face masks with and without exposure  
124 to ozone gas.

| Treatment of face masks <sup>a</sup> contaminated with HCoV-229E | Recovered virus <sup>b</sup><br>(log TCID <sub>50</sub> ± S.D.) |
|------------------------------------------------------------------|-----------------------------------------------------------------|
| None                                                             | 3.0 ± 0.2 (n = 4)                                               |
| Ozone gas (120 ppm <sup>c</sup> , 1 min)                         | 0 (n = 3)                                                       |
| Ozone gas (120 ppm, 5 min)                                       | 0 (n = 3)                                                       |

125 <sup>a</sup> Samples (30 mm × 35 mm in size) were cut from face masks (Kleenguard®; product number  
126 Y2-44015, Kimberly-Clark Worldwide, Inc., Irving, TX, USA) with 3-layers filtering. The front  
127 side was sprayed with about 250 µL of HCoV-229E culture (about 4.5 log TCID<sub>50</sub> per mL) and  
128 dried at room temperature for 15 min in a biosafety cabinet before exposed to ozone gas.

129 <sup>b</sup> Virus particles on the samples were collected by washing the sample surface with 5 mL of  
130 PBS (phosphate buffered saline, pH 7.4) and measured using MRC-5 cells (ATCC, Bethesda,  
131 MD, USA).<sup>11</sup>

132 <sup>c</sup> The ozone concentrations produced by the DBD plasma generator were measured via UV  
133 absorption spectroscopy.<sup>12</sup>

134 n: sample number.

135

### 136 **Partial degradation of viral RNA by ozone gas**

137 To understand the mechanism underlying the viral inactivation of face masks by ozone gas,  
138 the experimentally contaminated face masks (Kleenguard®; product # Y2-44015, Kimberly-  
139 Clark Worldwide, Inc., Irving, TX, USA)—with and without exposure to ozone gas for 5 min—  
140 were washed, and the washing solutions were assayed with the quantitative reverse  
141 transcription polymerase chain reaction (qRT-PCR).<sup>13</sup> Surprisingly, there was no significant

142 difference ( $p > 0.05$ ; student's t-test) in the amount of amplifiable RNAs between the  
143 unexposed and exposed masks, indicating that the short exposure may not fully degrade the  
144 viral RNA (Table 2). Similarly, the RNA of either H1N1 (Table S3) or *S. aureus* (Table S4) on the  
145 face masks was not totally degraded by the exposure to ozone gas. These results suggest that  
146 the loss of infectivity could be due to the damage to the viral envelope or envelope proteins,  
147 resulting in failure of the virus to attach itself to host cells.<sup>14</sup>

148

149 Table 2: qRT-PCR of HCoV-229E in washing solutions obtained from contaminated face masks  
150 with and without exposure to ozone gas.

| Treatment of face masks contaminated with HCoV-229E | Ct value <sup>a</sup> (mean $\pm$ S.D.) |
|-----------------------------------------------------|-----------------------------------------|
| None                                                | 22.7 $\pm$ 0.4 (n = 6)                  |
| Ozone gas (120 ppm, 5 min)                          | 23.1 $\pm$ 0.6 (n = 6)                  |

151 <sup>a</sup> cycle threshold (Ct) is defined as the number of cycles required for the fluorescent signal to  
152 exceed the background signal level (threshold). n: sample number.

153

#### 154 **No structural damage on the filter layer of face masks**

155 To test if the exposure of face masks (Kleenguard<sup>®</sup>) to either plasma or ozone gas causes any  
156 damage to their filter layer, uncontaminated face masks were exposed to ozone gas for 5 min  
157 (five 1-minute exposures). We did not see any noticeable damage on the front and back side  
158 of the face masks with eyes and under a light microscope, either (data not shown). Their inner  
159 filter layer composed of polypropylene meltblown non-woven fabric was further examined  
160 under a SEM. As shown in Figure 2, there was no detectable structural damage caused to the  
161 filter layer of the exposed face masks. The result showed that the repeated exposures (5 times)  
162 of face masks to ozone gas did cause structural damage to the face masks.

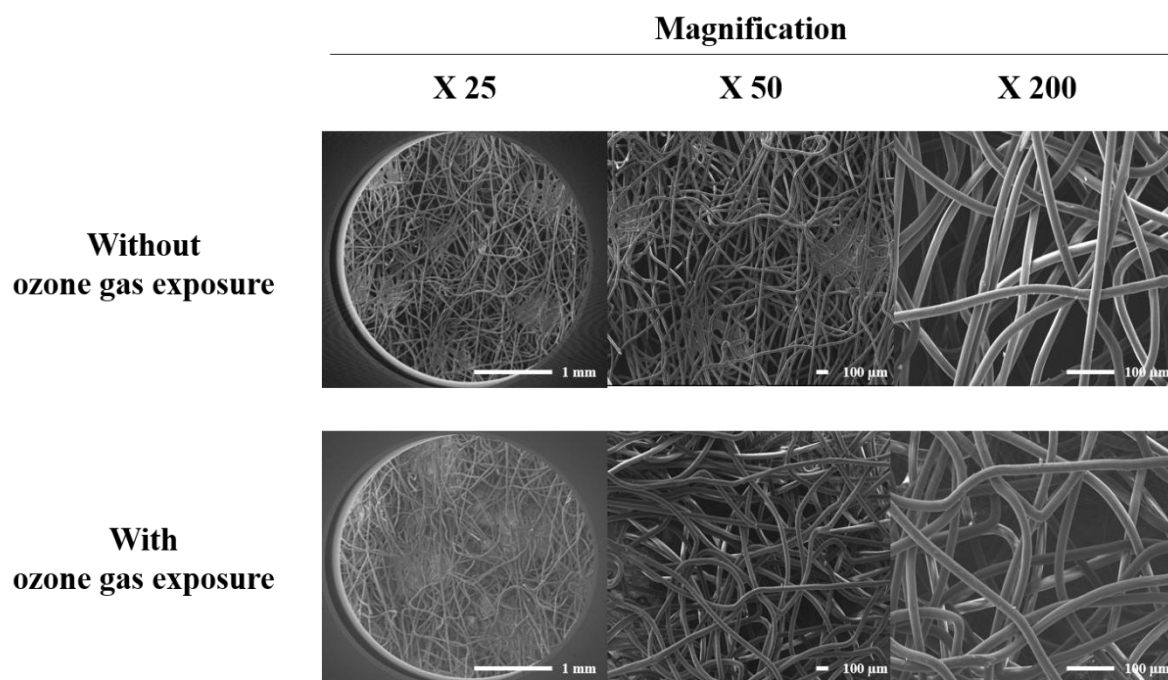

163

164 Figure 2. Scanning electron microscopy images of the filter layer of uncontaminated face  
165 masks (Kleenguard®) with and without exposures to ozone gas for 5 min (five 1-minute  
166 exposures). The images were taken by a field-emission scanning electron microscope (FE-  
167 SEM-EDS, JSM7500F, JEOL Ltd., Tokyo, Japan).

168

### 169 **No functional deterioration on face masks**

170 The electrocharged filter is an essential component of dust masks such as N95 and KF94 masks  
171 and there was a concern that the charge on the filter could be lost with its exposure to ozone  
172 gas. The functioning of KF94 masks (registration number: F1-28712011; Kleannara Co., Seoul,  
173 Korea) which are certified to filter out 94% of particulate matter (about 0.4  $\mu\text{m}$  diameter),  
174 after exposed to ozone gas for 5 min (five 1-minute exposures) was thus assessed using a  
175 standard test for measuring PFE with paraffin oil mists.<sup>15</sup> There was no statistical difference in  
176 PFE between the exposed and unexposed face masks (Table 3). Taken together with the SEM  
177 images, it is suggested that the repeated exposures (5 times) of face masks to ozone gas do  
178 not cause structural or functional damage to the face masks.

179

180

181

182 Table 3: PFE of uncontaminated face masks (KF94) with and without exposure to ozone gas.

| Certified testing lab <sup>a</sup> | Ozone gas treatment on uncontaminated face masks | PFE (%) <sup>b</sup><br>(Mean ± S.D.) |
|------------------------------------|--------------------------------------------------|---------------------------------------|
| FITI Testing & Research Institute  | None                                             | 98.5 ± 1.3 (n=3)                      |
|                                    | Ozone gas (120 ppm, 5 min)                       | 99.3 ± 1 (n=3)                        |
| Korea Mask Laboratory              | None                                             | 98.4 ± 0.5 (n=6)                      |
|                                    | Ozone gas (120 ppm, 5 min)                       | 98.6 ± 0.5 (n=6)                      |

183 <sup>a</sup> The lab is certified and registered as a testing lab by the ministry of food and drug safety  
184 (MFDS) in Korea.

185 <sup>b</sup> Measured by a standard method using paraffin mist. n: sample number.

186

## 187 ■ CONCLUSIONS

188 In this study, using a human coronavirus (HCoV-229E) as a surrogate for SARS-CoV-2  
189 contamination on face masks, the virus is shown to lose its infectivity to a human cell line  
190 (MRC-5) when exposed for a short period of time (1 min) to ozone gas produced by the DBD  
191 plasma generator. SEM and PFE tests revealed that there was no structural or functional  
192 deterioration observed in the face masks even after they underwent excessive exposure to  
193 ozone (five 1-minute exposures).

194 Ozone gas is a strong oxidizing agent with the ability to kill viruses on hard-to-reach  
195 surfaces, including the fabric structure of face masks. Inexpensive consumer-grade ozone  
196 generators are widely available. Our results suggest that it may be possible to rapidly disinfect  
197 face masks contaminated with SARS-CoV-2 using a plasma generator in a well-ventilated place.

198

## 199 ■ MATERIALS AND METHODS

### 200 DBD plasma generator

201 The plasma generator consists of a high-voltage, high-frequency generator (Minipuls 2.2; GBS  
202 Elektronik GmbH, Großerkmannsdorf, Germany) and two electrodes separated by a 1 mm -  
203 thick alumina dielectric barrier. Each electrode was made of a perforated stainless-steel plate  
204 and bare aluminum tape. The plasma was produced only at the perforated electrode, along  
205 the rims of the holes. As the dielectric barrier allows electrons and ions to accumulate on the  
206 surface, preventing the transition from a cold plasma to an arc, a sinusoidal voltage was  
207 applied to steadily produce the plasma (Figure S2). The plasma was turned on for 1 min after  
208 every 4 min to avoid any damage resulting from thermal heating.



## 209 **UV absorption spectroscopy**

210 The ozone concentrations produced by the DBD plasma generator were measured via UV  
211 absorption spectroscopy.<sup>16</sup> Light from a mercury lamp (BHK 90-0005-01, spectral line: 253.65  
212 nm) was collimated using lenses and an optical fiber and sent through a gas medium, 4.3 cm  
213 above the electrode surface where the plasma is produced. The transmitted light intensity  
214 was then measured using a spectrometer (AvaSpec-2048L). As the wavelength-dependent  
215 absorption cross section of ozone is broad near 253.65 nm and known as  $1.137 \cdot 10^{-17}$   
216  $\text{cm}^2\text{molecule}^{-1}$ , the ozone concentration can be evaluated by the Beer-Lambert law described  
217 as follows:

$$n_{O_3} = -\frac{1}{\sigma_{O_3}L} \ln\left(\frac{I}{I_0}\right) \quad (1)$$

218 where  $I$  and  $I_0$  are the transmitted and incident light intensities;  $n_{O_3}$  is the number density of  
219 ozone;  $\sigma_{O_3}$  is the ozone absorption cross-section near 253.65 nm;  $L$  is the optical path length.  
220 The ozone concentrations under the test conditions were determined to be approximately  
221 120 ppm.

## 222 **Coronavirus culture**

223 HCoV-229E was cultured using human fetal lung fibroblast cell (MRC-5; ATCC, Bethesda, MD,  
224 USA) in a 96-well plate.<sup>11</sup>

## 225 **Exposure of face masks experimentally contaminated with HCoV-229E to ozone gas**

226 Samples ( $n = 6$ ) were cut (30 mm  $\times$  35 mm in size) from face masks and sprayed with about  
227 250  $\mu\text{L}$  of HCoV-229E culture (4.5 log TCID<sub>50</sub> per mL) in a biosafety cabinet at a biosafety level-  
228 2 (BSL-2) laboratory while wearing face masks and gloves. The samples were then dried for  
229 15 min at 25 °C and were individually exposed to ozone for both 1 and 5 min using the plasma  
230 generator (Figure 1) in a chemical hood.

## 231 **Determination of TCID<sub>50</sub> value**

232 Immediately after the exposure, the virus particles on the samples were collected by washing  
233 the samples with 5 mL of PBS (phosphate buffered saline, pH 7.4). TCID<sub>50</sub> was determined by  
234 adding serial 10-fold dilutions of HCoV-229E collected from each mask into a human fetal lung  
235 fibroblast cell (MRC-5, ATCC, Bethesda, MD, USA) monolayer in a 96-well plate.<sup>11</sup> The plates

236 were observed for cytopathic effects for 4 days. The viral titer was calculated via the Reed and  
237 Munch endpoint method.<sup>11</sup> Viral titer collected from the face masks was measured using  
238 MRC-5 cells (ATCC, Bethesda, MD, USA).<sup>11</sup>

#### 239 **RT-PCR**

240 Immediately after the exposure, the virus particles on the samples were collected by washing  
241 the samples with 5 mL of PBS. qRT-PCR was performed using StepOne™ Real-Time PCR system  
242 (Applied biosystems, CA, USA) and MG 2X One Step RT-PCR SYBR® Green Master Mix reagents  
243 (Cancer Rop Co Ltd., Seoul, Korea). A segment of the *N* gene of HCoV229E was amplified using  
244 a forward primer (CGCAAGAATTCAGAACCAGAG) and a reverse primer  
245 (GGCAGTCAGGTTCTCAACAA)<sup>13</sup> with an amplicon size of 83 bp (Bioneer, Daejeon, Korea). The  
246 thermocycler conditions were as follows: reverse transcriptase at 50 °C for 30 min and an  
247 initial denaturation at 95 °C for 5 min, followed by 45 cycles of denaturation at 95 °C for 15 s,  
248 annealing at 52 °C for 30 s, and an extension at 72 °C for 30 s. To confirm that the target  
249 amplicon was properly formed, a melting curve analysis was conducted. The fluorescence  
250 intensity was measured within the range of 60–95 °C at a rate of 0.2 °C/s.

#### 251 **SEM**

252 A field-emission scanning electron microscope (FE-SEM-EDS, JSM7500F, JEOL Ltd., Tokyo,  
253 Japan) was used to take images of untreated and treated masks (n=4). To obtain the  
254 morphology of the electrostatic melt blown filter layer, which is the middle layer of the face  
255 mask, the melt blown filter was cut to obtain a 5 mm x 5 mm sample that was coated with  
256 iridium (Ir) for 15 minutes via the ion sputtering method. The FE-SEM-EDS was operated at 15  
257 kV, and the working distance (WD) was 8 mm. All the sample images were acquired with  
258 magnification factors of 25, 50, and 200.

#### 259 **Paraffin Oil Test**

260 The standard test for measuring the filtration efficiency with paraffin oil mist was performed  
261 on masks at FITI Testing & Research Institute (Cheongju, Korea) and Korea Mask Laboratory  
262 (KML; Hanam city, Korea), the authorized testing organizations in Korea. In this test, a tester  
263 first produces paraffin oil mist with a particle size ranging from 0.05 to 1.7 µm, 0.4 µm on  
264 average.<sup>15</sup> The flow containing the paraffin oil aerosol at a concentration of 20 ± 5 mg/m<sup>3</sup> is  
265 then blown towards the mask at a flow rate of 95 L/min. The filtration efficiency, given by Eq.

266 (2), is then evaluated by measuring the concentrations of paraffin oil mist upstream and  
267 downstream of the mask. The efficiency is a value averaged over 30 s and must be measured  
268 within 3 min after the test starts.

$$P = \frac{C_1 - C_2}{C_1} \times 100 \quad (2)$$

269 where  $P$  is the filtration efficiency;  $C_1$  and  $C_2$  are the concentrations of paraffin oil mist  
270 upstream and downstream of the mask, respectively.

271

272 **Supplementary Materials:** Supplementary materials can be found at [www.mdpi.com/xxx/s1](http://www.mdpi.com/xxx/s1).

273 **Acknowledgements:** We thank Ms. J. So for giving an idea for the project.

274 **Funding:** S.P. was supported by the BioNano Health-Guard Research Centre as a Global  
275 Frontier Project (H-guard 2018M3A6B2057299) through the National Research Foundation  
276 (NRF) of Ministry of Science and ICT (MSIT) in Korea. M.S.B. was supported by a grant through  
277 a future integration program of Kangbuk Samsung Hospital-Biomedical Institute for  
278 Convergence (BICS) at Sungkyunkwan University.

279 **Conflicts of Interest:** The authors declare no conflict of interest.

280

281

282

283

284

285

286

287

288

289

290

291

292

293

294 **References**

- 295 1. Leung NHL, Chu DKW, Shiu EYC, et al. Respiratory virus shedding in exhaled breath and  
296 efficacy of face masks. *Nat Med*. 2020. doi:10.1038/s41591-020-0843-2.
- 297 2. Kumar A, Kasloff SB, Leung A, et al. N95 Mask Decontamination using Standard  
298 Hospital Sterilization Technologies. Preprint. Posted online April 08, 2020. MedRxiv.  
299 doi:10.1101/2020.04.05.20049346.
- 300 3. Hudson JB, Sharma M, Vimalanathan S. Development of a practical method for using  
301 ozone gas as a virus decontaminating agent. *Ozone Sci Eng*. 2009;31(3):216-223.  
302 doi:10.1080/01919510902747969.
- 303 4. Zimmermann JL, Dumler K, Shimizu T, et al. Effects of cold atmospheric plasmas on  
304 adenoviruses in solution. *J Phys D Appl Phys*. 2011;44(50):505201. doi:10.1088/0022-  
305 3727/44/50/505201.
- 306 5. Mastanaiah N, Johnson JA, Roy S. Effect of dielectric and liquid on plasma sterilization  
307 using dielectric barrier discharge plasma. *PLoS One*. 2013;8(8):e70840  
308 doi:10.1371/journal.pone.0070840.
- 309 6. Morfill GE, Shimizu T, Steffes B, Schmidt HU. Nosocomial infections—a new approach  
310 towards preventive medicine using plasmas. *New J Phys*. 2009;11(11):115019..
- 311 7. Van Der Hoek L, Pyrc K, Berkhout B. Human coronavirus NL63, a new respiratory  
312 virus. *FEMS Microbiol Rev*. 2006;30(5):760-773. doi:10.1111/j.1574-  
313 6976.2006.00032.x.
- 314 8. Wentworth D, Holmes KV. Molecular determinants of species specificity in the  
315 coronavirus receptor aminopeptidase N (CD13): influence of N-linked glycosylation. *J*  
316 *Virol*. 2001;75(20):9741-9752. doi:10.1128/JVI.75.20.9741-9752.2001.
- 317 9. Stefanovic I, Bibinov N, Deryugin A, et al. Kinetics of ozone and nitric oxides in dielectric  
318 barrier discharges in O<sub>2</sub>/NO<sub>x</sub> and N<sub>2</sub>/O<sub>2</sub>/NO<sub>x</sub> mixtures. *Plasma Sources Sci Technol*.  
319 2001;10(3):406.
- 320 10. Dotis J, Roilides EJH. H1N1 Influenza A infection. *Hippokratia*. 2009;13(3):135-138.
- 321 11. Reed LJ, Muench H. A simple method of estimating fifty per cent endpoints. *Am J*  
322 *Epidemiol*. 1938;27(3):493-497. doi:10.1093/oxfordjournals.aje.a118408.

- 323 12. Reuter S, Winter J, Iseni S, et al. Detection of ozone in a MHz argon plasma bullet jet.  
324 *Plasma Sources Sci Technol.* 2012;21(3):034015.
- 325 13. Lu R, Yu X, Wang W, et al. Characterization of human coronavirus etiology in Chinese  
326 adults with acute upper respiratory tract infection by real-time RT-PCR assays. *PLoS*  
327 *One.* 2012;7(6):e38638 doi:10.1371/journal.pone.0038638.
- 328 14. Tseng C, Li C. Inactivation of surface viruses by gaseous ozone. *J Environ Health.*  
329 2008;70(10):56-63.
- 330 15. Choi HW, Yoon S, Lee JH, et al. Comparison of pressure drop and filtration efficiency  
331 of particulate respirators using welding fumes and sodium chloride. *Ann. Occup. Hyg.*  
332 2011;55(6):666-680. doi: 10.1093/annhyg/mer032.
- 333 16. Orphal J, Staehelin J, Tamminen J, et al. Absorption cross-sections of ozone in the  
334 ultraviolet and visible spectral regions: Status report 2015. *J Mol Spectrosc.*  
335 2016;327:105-121. doi: 10.1016/j.jms.2016.07.007.
- 336
